# Supplementary material for: Thyroid transcription factor-1 (TTF-1) expression and the efficacy of combination therapy with immune checkpoint inhibitors and cytotoxic chemotherapy in non-squamous non-small cell lung cancer
Source: PubMed Central journal article supplement — Transl Lung Cancer Res. 2023 Sep 13;12(9):1850–61. doi: 10.21037/tlcr-23-331 (PMC10579824; doi:10.21037/tlcr-23-331), 2023-09-13
Supplement: tlcr-12-09-1850-dss.pdf [file tlcr-12-09-1850-dss.pdf]

## Data Sharing Statement

|                     |                                                                                                                                                     |                                                                                                                 |
|---------------------|-----------------------------------------------------------------------------------------------------------------------------------------------------|-----------------------------------------------------------------------------------------------------------------|
| <b>Article Info</b> | <a href="https://dx.doi.org/10.21037/tlcr-23-331">https://dx.doi.org/10.21037/tlcr-23-331</a>                                                       |                                                                                                                 |
| <b>Item</b>         | <b>Question</b>                                                                                                                                     | <b>Authors' Response<br/>(place "-" if not applicable)</b>                                                      |
| 1                   | Would you like to share data collected for your study to others?                                                                                    | Yes.                                                                                                            |
| 2                   | If not, would you like to share the reason for your decision?                                                                                       | -                                                                                                               |
| 3                   | What data in particular will be shared?                                                                                                             | All data.                                                                                                       |
| 4                   | Any other documents will be shared? Such as study protocol, statistical analysis plan, informed consent form, clinical study report, analytic code. | Statistical analysis plan, study protocol, etc.                                                                 |
| 5                   | When will data availability begin?                                                                                                                  | From the publication date.                                                                                      |
| 6                   | When will data availability end?                                                                                                                    | Basically valid for three years from the publication date, but we will respond as needed on reasonable request. |
| 7                   | To whom will you share the data?                                                                                                                    | Pulmonologists who are interested in the relationship between TTF-1 expression and treatment efficacy.          |
| 8                   | For what type of analysis or purpose?                                                                                                               | For analysis to evaluate the treatment efficacy in TTF-1-negative patients.                                     |
| 9                   | How or where can the data/documents be obtained?                                                                                                    | Email could be sent to the corresponding author of the manuscript.                                              |
| 10                  | Any other restrictions?                                                                                                                             | None.                                                                                                           |
